# Supplementary material for: Predictive accuracy of the 2- and 8-item versions of the PHQ in measuring symptoms of depression: Brazilian National Health Survey (PNS) 2013-2019
Source: Research Square preprint supplement (doi:10.21203/rs.3.rs-7473964/v1), 2025-09-30
Supplement: Supplementary file 1 [file 35f47d7ec30224d3a98378d8.docx]

**Predictive accuracy of the 2- and 8-item versions of the PHQ in measuring symptoms of depression: Brazilian National Health Survey (PNS) 2013-2019**

Leidiane Rafaela Fernandes de Oliveira¹; Bruna Carolina Rafael Barbosa¹; Mariana Cassemira Aparecida Vidigal¹; Adriana Lúcia Meireles¹, Luiz Antônio Alves de Menezes-Júnior1,2

1 Federal University of Ouro Preto, Ouro Preto, Minas Gerais, Brazil

2 Ministry of Health, Brasilia, Brazilia, Federal District, Brazil.

**Corresponding Author:**

Luiz Antônio Alves de Menezes-Júnior, Dietitian, PhD, Permanent Professor; Post-Graduate Program in Health and Nutrition, School of Nutrition, Federal University of Ouro Preto, R. Diogo de Vasconcelos, 122, Ouro Preto, Minas Gerais, Brazil. E-mail: [luiz.menezes@ufop.edu.br](mailto:luiz.menezes@ufop.edu.br)

| **Supplementary Table 1:** Unidimensional Reliability of PHQ-9, PHQ-8 and PHQ-2. | | |
| --- | --- | --- |
| DASS-versions | Parameter | Point estimate |
| PHQ-9 | McDonald's ω | 0.853 |
| Cronbach's α | 0.862 |
| PHQ-8 | McDonald's ω | 0.854 |
| Cronbach's α | 0.862 |
| PHQ-2 | McDonald's ω | 0.708 |
| Cronbach's α | 0.708 |
| Legend: Alpha (α) and Omega (ω) coefficients were calculated to assess the internal consistency of the Patient Health Questionnaire (PHQ) scales. The coefficients reflect the unidimensional reliability of each scale. | | |


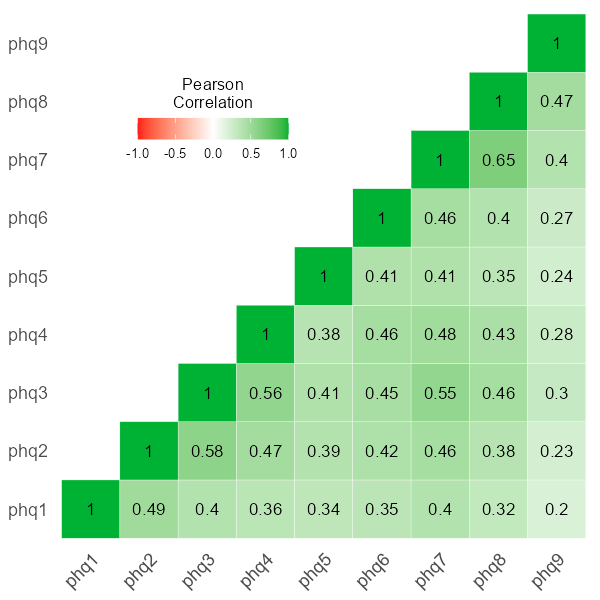


**Supplementary Figure 1.** Heat map of correlations of the Patient Health Questionnaire scale

| **Supplementary Table 2.** Differences in depressive symptom prevalence between PHQ-9, PHQ-8, and PHQ-2 scales, PNS (2013 and 2019). | | | |
| --- | --- | --- | --- |
| **Characteristics** | **Difference between scales** | | |
| **PHQ8 - PHQ9** | **PHQ2 - PHQ9** | **PHQ2 - PHQ8** |
| **Total** | -0.29% | 1.03% | 1.32% |
| **Sex** |  |  |  |
| Male | -0.17% | 0.64% | 0.81% |
| Female | -0.39% | 1.38% | 1.77% |
| **Age** |  |  |  |
| 18 to 29 years | -0.30% | 1.12% | 1.42% |
| 30 to 44 years | -0.28% | 0.99% | 1.28% |
| 45 to 59 years | -0.27% | 0.71% | 0.98% |
| 60 to 74 years | -0.31% | 1.68% | 1.99% |
| 75 years or older | -0.24% | 0.61% | 0.86% |
| **Race/skin color** |  |  |  |
| Black | -0.25% | 0.96% | 1.21% |
| Brown | -0.37% | 0.87% | 1.24% |
| Indigenous | -0.30% | 0.19% | 0.49% |
| White | -0.22% | 1.21% | 1.43% |
| Yellow | -0.28% | 1.35% | 1.62% |
| **Marital status** |  |  |  |
| Married | -0.23% | 0.71% | 0.94% |
| Not married | -0.33% | 1.29% | 1.62% |
| **Per capita income** |  |  |  |
| Up to 1/2 MW | -1.69% | -1.23% | 0.45% |
| 1/2 to 1 MW | -1.33% | -0.96% | 0.37% |
| 1 to 2 MW | -1.22% | -0.97% | 0.25% |
| 2 to 3 MW | -0.09% | 0.04% | 0.13% |
| More than 3 MW | -1.37% | -1.12% | 0.25% |
| **Education** |  |  |  |
| Incomplete primary or equivalent | -0.41% | 1.11% | 1.52% |
| High school incomplete or equivalent | -0.29% | 1.62% | 1.91% |
| Higher education incomplete or equivalent | -0.21% | 0.95% | 1.16% |
| Higher education complete | -0.14% | 0.42% | 0.56% |
| **Type of census situation** |  |  |  |
| Urban | -0.28% | 1.02% | 1.30% |
| Rural | -0.33% | 1.12% | 1.45% |
| **Region** |  |  |  |
| North | -0.29% | 1.24% | 1.54% |
| Northeast | -0.34% | 0.81% | 1.15% |
| Southeast | -0.26% | 1.08% | 1.34% |
| South | -0.24% | 1.17% | 1.41% |
| Midwest | -0.34% | 1.06% | 1.40% |
| **Edition** |  |  |  |
| PNS-2013 | -0.26% | 1.27% | 1.53% |
| PNS-2019 | -0.31% | 0.82% | 1.13% |
| **Alcohol** |  |  |  |
| **Heavy episodic consumption** |  |  |  |
| Yes | -0.29% | 0.77% | 1.06% |
| No | -0.29% | 1.08% | 1.37% |
| **Tobacco** |  |  |  |
| Yes | -0.52% | 1.70% | 2.23% |
| No | -0.25% | 0.93% | 1.18% |
| **Medical diagnosis of depression** |  |  |  |
| No | -0.23% | 1.06% | 1.29% |
| Yes | -0.89% | 0.78% | 1.67% |
| **NCD** |  |  |  |
| None | -0.15% | 1.05% | 1.20% |
| 1 or more | -0.43% | 1.01% | 1.44% |
| **Self-assessed health** |  |  |  |
| Good or very good | -0.15% | 1.07% | 1.22% |
| Fair, poor or very poor | -0.56% | 0.96% | 1.52% |
| NCD: Chronic non-communicable disease; MW: Minimum Wage; CI-LB: Lower bound of confidence interval; CI-UB: Upper bound of confidence interval; p: p-value; PHQ: Patient Health Questionnaire.  This table compares percentage differences in depressive symptom prevalence identified by the PHQ-8 and PHQ-2 relative to the PHQ-9, stratified by sociodemographic and health characteristics. | | | |

| **Supplementary Table 3.** Predictive values of reduced PHQ subscales (8 and 2 items) compared to scale with 9 items, according sex, PNS (2013 and 2019). | | | | | | | | | | |
| --- | --- | --- | --- | --- | --- | --- | --- | --- | --- | --- |
| **Male** | | | | | | **Female** | | | | |
| **PHQ-9 score** | |  |  |  |  |  |  |  |  |  |
| **Cutpoint** | **Sens** | **Esp** | **CC** | **AUC** | **Youden index** | **Sens** | **Esp** | **CC** | **AUC** | **Youden index** |
| ≥ 0 | 100.0% | 0.0% | 5.5% | 50.0% | 0.000 | 100.0% | 0.0% | 13.1% | 50.0% | 0.000 |
| ≥ 1 | 100.0% | 53.6% | 56.1% | 76.8% | 0.536 | 100.0% | 40.2% | 48.0% | 70.1% | 0.402 |
| ≥ 2 | 100.0% | 66.6% | 68.4% | 83.3% | 0.666 | 100.0% | 52.3% | 58.5% | 76.1% | 0.523 |
| ≥ 3 | 100.0% | 75.1% | 76.5% | 87.6% | 0.751 | 100.0% | 62.1% | 67.1% | 81.1% | 0.621 |
| ≥ 4 | 100.0% | 83.0% | 83.9% | 91.5% | 0.830 | 100.0% | 71.7% | 75.4% | 85.9% | 0.717 |
| ≥ 5 | 100.0% | 88.2% | 88.8% | 94.1% | 0.882 | 100.0% | 78.8% | 81.6% | 89.4% | 0.788 |
| ≥ 6 | 100.0% | 91.7% | 92.2% | 95.9% | 0.917 | 100.0% | 84.6% | 86.6% | 92.3% | 0.846 |
| ≥ 7 | 100.0% | 94.9% | 95.2% | 97.4% | 0.949 | 100.0% | 90.0% | 91.3% | 95.0% | 0.900 |
| ≥ 8 | 99.8% | 97.1% | 97.2% | 98.4% | 0.968 | 99.7% | 94.2% | 94.9% | 97.0% | 0.940 |
| ≥ 9 | 99.1% | 98.7% | 98.7% | 98.9% | 0.977 | 99.3% | 97.5% | 97.7% | 98.4% | 0.968 |
| ≥ 10 | 96.2% | 100.0% | 99.8% | 98.1% | 0.962 | 96.6% | 100.0% | 99.6% | 98.3% | 0.966 |
| ≥ 11 | 76.9% | 100.0% | 98.7% | 88.5% | 0.769 | 80.3% | 100.0% | 97.4% | 90.1% | 0.803 |
| ≥ 12 | 64.3% | 100.0% | 98.0% | 82.1% | 0.643 | 67.9% | 100.0% | 95.8% | 83.9% | 0.679 |
| ≥ 13 | 51.6% | 100.0% | 97.3% | 75.8% | 0.516 | 55.6% | 100.0% | 94.2% | 77.8% | 0.556 |
| ≥ 14 | 42.1% | 100.0% | 96.8% | 71.1% | 0.421 | 46.7% | 100.0% | 93.1% | 73.3% | 0.467 |
| ≥ 15 | 34.0% | 100.0% | 96.4% | 67.0% | 0.340 | 38.1% | 100.0% | 91.9% | 69.1% | 0.381 |
| ≥ 16 | 20.6% | 100.0% | 95.6% | 60.3% | 0.206 | 23.9% | 100.0% | 90.1% | 61.9% | 0.239 |
| ≥ 17 | 17.0% | 100.0% | 95.4% | 58.5% | 0.170 | 19.4% | 100.0% | 89.5% | 59.7% | 0.194 |
| ≥ 18 | 13.1% | 100.0% | 95.2% | 56.6% | 0.131 | 14.4% | 100.0% | 88.8% | 57.2% | 0.144 |
| ≥ 19 | 10.4% | 100.0% | 95.1% | 55.2% | 0.104 | 11.4% | 100.0% | 88.4% | 55.7% | 0.114 |
| ≥ 20 | 7.6% | 100.0% | 94.9% | 53.8% | 0.076 | 9.0% | 100.0% | 88.1% | 54.5% | 0.090 |
| ≥ 21 | 3.0% | 100.0% | 94.7% | 51.5% | 0.030 | 3.5% | 100.0% | 87.4% | 51.7% | 0.035 |
| ≥ 22 | 2.4% | 100.0% | 94.6% | 51.2% | 0.024 | 2.5% | 100.0% | 87.3% | 51.2% | 0.025 |
| ≥ 23 | 0.0% | 100.0% | 94.5% | 50.0% | 0.000 | 0.0% | 100.0% | 87.0% | 50.0% | 0.000 |
| ≥ 24 | 100.0% | 0.0% | 5.5% | 50.0% | 0.000 | 100.0% | 0.0% | 13.1% | 50.0% | 0.000 |
| **PHQ-2** | | | | | | | | | |  |
| ≥ 0 | 100.0% | 0.0% | 5.5% | 50.0% | 0.000 | 100.0% | 0.0% | 13.1% | 50.0% | 0.000 |
| ≥ 1 | 97.7% | 77.7% | 78.8% | 87.7% | 0.754 | 98.5% | 64.8% | 69.2% | 81.7% | 0.633 |
| ≥ 2 | 92.1% | 91.5% | 91.6% | 91.8% | 0.837 | 94.2% | 83.7% | 85.1% | 88.9% | 0.779 |
| ≥ 3 | 76.2% | 97.8% | 96.6% | 87.0% | 0.739 | 80.0% | 95.2% | 93.2% | 87.6% | 0.752 |
| ≥ 4 | 52.4% | 99.5% | 96.9% | 76.0% | 0.519 | 57.8% | 98.8% | 93.4% | 78.3% | 0.566 |
| ≥ 5 | 29.6% | 99.9% | 96.0% | 64.8% | 0.295 | 32.5% | 99.8% | 91.0% | 66.1% | 0.322 |
| ≥ 6 | 19.4% | 100.0% | 95.5% | 59.7% | 0.194 | 21.9% | 99.9% | 89.7% | 60.9% | 0.218 |

| **Supplementary Table 4.** Predictive values of reduced PHQ subscales (8 and 2 items) compared to scale with 9 items, according age, PNS (2013 and 2019). | | | | | | | | | | | | | | | | | | | | | | | |
| --- | --- | --- | --- | --- | --- | --- | --- | --- | --- | --- | --- | --- | --- | --- | --- | --- | --- | --- | --- | --- | --- | --- | --- |
| **18 to 29 years** | | | | | **30 to 44 years** | | | | **45 to 59 years** | | | | | **60 to 74 years** | | | | | **75 years or older** | | | | |
| **PHQ-9 scores** | |  |  |  |  |  |  |  |  |  |  |  |  | |  |  |  |  | |  |  |  |
| **Cutpoint** | **Sens** | **Esp** | **CC** | **AUC** | **Sens** | **Esp** | **CC** | **AUC** | **Sens** | **Esp** | **CC** | **AUC** | **Sens** | | **Esp** | **CC** | **AUC** | **Sens** | | **Esp** | **CC** | **AUC** |
| ≥ 0 | 100.0% | 0.0% | 8.4% | 0.50 | 100.0% | 0.0% | 9.4% | 0.50 | 100.0% | 0.0% | 10.9% | 0.50 | 100.0% | | 0.0% | 9.2% | 0.50 | 100.0% | | 0.0% | 10.7% | 0.50 |
| ≥ 1 | 100.0% | 48.6% | 52.9% | 0.74 | 100.0% | 48.0% | 52.9% | 0.74 | 100.0% | 45.3% | 51.3% | 0.73 | 100.0% | | 45.2% | 50.2% | 0.73 | 100.0% | | 40.9% | 47.2% | 0.70 |
| ≥ 2 | 100.0% | 60.6% | 63.9% | 0.80 | 100.0% | 60.6% | 64.3% | 0.80 | 100.0% | 57.9% | 62.5% | 0.79 | 100.0% | | 58.1% | 62.0% | 0.79 | 100.0% | | 53.4% | 58.4% | 0.77 |
| ≥ 3 | 100.0% | 69.8% | 72.4% | 0.85 | 100.0% | 69.6% | 72.5% | 0.85 | 100.0% | 67.2% | 70.8% | 0.84 | 100.0% | | 67.5% | 70.5% | 0.84 | 100.0% | | 63.1% | 67.0% | 0.82 |
| ≥ 4 | 100.0% | 78.1% | 79.9% | 0.89 | 100.0% | 77.8% | 79.9% | 0.89 | 100.0% | 76.2% | 78.8% | 0.88 | 100.0% | | 77.1% | 79.2% | 0.89 | 100.0% | | 73.6% | 76.5% | 0.87 |
| ≥ 5 | 100.0% | 84.0% | 85.3% | 0.92 | 100.0% | 83.7% | 85.3% | 0.92 | 100.0% | 82.4% | 84.3% | 0.91 | 100.0% | | 83.6% | 85.1% | 0.92 | 100.0% | | 81.0% | 83.0% | 0.91 |
| ≥ 6 | 100.0% | 88.3% | 89.3% | 0.94 | 100.0% | 88.3% | 89.4% | 0.94 | 100.0% | 87.3% | 88.7% | 0.94 | 100.0% | | 88.4% | 89.5% | 0.94 | 100.0% | | 86.6% | 88.0% | 0.93 |
| ≥ 7 | 100.0% | 92.5% | 93.1% | 0.96 | 100.0% | 92.4% | 93.2% | 0.96 | 100.0% | 91.8% | 92.7% | 0.96 | 100.0% | | 92.8% | 93.4% | 0.96 | 100.0% | | 91.9% | 92.7% | 0.96 |
| ≥ 8 | 99.7% | 95.7% | 96.0% | 0.98 | 99.8% | 95.6% | 96.0% | 0.98 | 99.7% | 95.4% | 95.9% | 0.98 | 99.8% | | 95.8% | 96.2% | 0.98 | 99.8% | | 95.0% | 95.5% | 0.97 |
| ≥ 9 | 99.2% | 98.1% | 98.2% | 0.99 | 99.2% | 98.2% | 98.3% | 0.99 | 99.4% | 97.9% | 98.1% | 0.99 | 99.2% | | 98.1% | 98.2% | 0.99 | 99.4% | | 97.7% | 97.8% | 0.99 |
| ≥ 10 | 96.0% | 100.0% | 99.7% | 0.98 | 96.4% | 100.0% | 99.7% | 0.98 | 96.8% | 100.0% | 99.7% | 0.98 | 96.3% | | 100.0% | 99.7% | 0.98 | **97.3%** | | **100.0%** | **99.7%** | **0.99** |
| ≥ 11 | 75.7% | 100.0% | 98.0% | 0.88 | 79.6% | 100.0% | 98.1% | 0.90 | 80.8% | 100.0% | 97.9% | 0.90 | 80.0% | | 100.0% | 98.2% | 0.90 | 80.2% | | 100.0% | 97.9% | 0.90 |
| ≥ 12 | 62.5% | 100.0% | 96.9% | 0.81 | 67.2% | 100.0% | 96.9% | 0.84 | 69.1% | 100.0% | 96.6% | 0.85 | 67.0% | | 100.0% | 97.0% | 0.83 | 68.1% | | 100.0% | 96.6% | 0.84 |
| ≥ 13 | 49.0% | 100.0% | 95.7% | 0.74 | 55.1% | 100.0% | 95.8% | 0.78 | 57.0% | 100.0% | 95.3% | 0.78 | 55.0% | | 100.0% | 95.9% | 0.78 | 55.6% | | 100.0% | 95.3% | 0.78 |
| ≥ 14 | 40.1% | 100.0% | 95.0% | 0.70 | 45.4% | 100.0% | 94.9% | 0.73 | 48.4% | 100.0% | 94.4% | 0.74 | 46.0% | | 100.0% | 95.1% | 0.73 | 46.4% | | 100.0% | 94.3% | 0.73 |
| ≥ 15 | 31.2% | 100.0% | 94.2% | 0.66 | 37.4% | 100.0% | 94.1% | 0.69 | 40.0% | 100.0% | 93.5% | 0.70 | 36.7% | | 100.0% | 94.2% | 0.68 | 39.0% | | 100.0% | 93.5% | 0.69 |
| ≥ 16 | 19.2% | 100.0% | 93.2% | 0.60 | 23.3% | 100.0% | 92.8% | 0.62 | 25.3% | 100.0% | 91.9% | 0.63 | 22.1% | | 100.0% | 92.9% | 0.61 | 24.3% | | 100.0% | 91.9% | 0.62 |
| ≥ 17 | 15.1% | 100.0% | 92.9% | 0.58 | 19.1% | 100.0% | 92.4% | 0.60 | 20.9% | 100.0% | 91.4% | 0.60 | 18.0% | | 100.0% | 92.5% | 0.59 | 19.0% | | 100.0% | 91.4% | 0.59 |
| ≥ 18 | 10.6% | 100.0% | 92.5% | 0.55 | 14.5% | 100.0% | 92.0% | 0.57 | 16.3% | 100.0% | 90.9% | 0.58 | 13.7% | | 100.0% | 92.1% | 0.57 | 12.9% | | 100.0% | 90.7% | 0.56 |
| ≥ 19 | 8.1% | 100.0% | 92.3% | 0.54 | 11.3% | 100.0% | 91.7% | 0.56 | 13.1% | 100.0% | 90.5% | 0.57 | 10.7% | | 100.0% | 91.8% | 0.55 | 10.2% | | 100.0% | 90.4% | 0.55 |
| ≥ 20 | 6.0% | 100.0% | 92.1% | 0.53 | 8.9% | 100.0% | 91.4% | 0.54 | 10.2% | 100.0% | 90.2% | 0.55 | 8.5% | | 100.0% | 91.6% | 0.54 | 8.1% | | 100.0% | 90.2% | 0.54 |
| ≥ 21 | 2.1% | 100.0% | 91.8% | 0.51 | 3.4% | 100.0% | 90.9% | 0.52 | 4.3% | 100.0% | 89.6% | 0.52 | 2.6% | | 100.0% | 91.1% | 0.51 | 3.9% | | 100.0% | 89.8% | 0.52 |
| ≥ 22 | 1.7% | 100.0% | 91.8% | 0.51 | 2.5% | 100.0% | 90.8% | 0.51 | 3.0% | 100.0% | 89.4% | 0.52 | 1.8% | | 100.0% | 91.0% | 0.51 | 3.4% | | 100.0% | 89.7% | 0.52 |
| ≥ 23 | 0.0% | 100.0% | 91.6% | 0.50 | 0.0% | 100.0% | 90.6% | 0.50 | 0.0% | 100.0% | 89.1% | 0.50 | 0.0% | | 100.0% | 90.8% | 0.50 | 0.0% | | 100.0% | 89.3% | 0.50 |
| ≥ 24 | 100.0% | 0.0% | 8.4% | 0.50 | 100.0% | 0.0% | 9.4% | 0.50 | 100.0% | 0.0% | 10.9% | 0.50 | 100.0% | | 0.0% | 9.2% | 0.50 | 100.0% | | 0.0% | 10.7% | 0.50 |
| **PHQ-2 scores** | |  |  |  |  |  |  |  |  |  |  |  |  | |  |  |  |  | |  |  |  |
| ≥ 0 | 100.00% | 0.00% | 8.38% | 0.50 | 100.00% | 0.00% | 9.41% | 0.50 | 100.00% | 0.00% | 10.90% | 0.50 | 100.00% | | 0.00% | 9.16% | 0.50 | 100.00% | | 0.00% | 10.67% | 0.50 |
| ≥ 1 | 97.51% | 70.50% | 72.76% | 0.84 | 98.33% | 71.14% | 73.70% | 0.85 | 98.65% | 70.26% | 73.35% | 0.85 | 98.52% | | 72.10% | 74.52% | 0.85 | 97.78% | | 71.37% | 74.19% | 0.85 |
| ≥ 2 | 91.72% | 87.49% | 87.85% | 0.90 | 93.53% | 87.38% | 87.95% | 0.90 | 94.66% | 86.93% | 87.77% | 0.91 | 94.73% | | 87.85% | 88.48% | 0.91 | 92.48% | | 88.18% | 88.64% | 0.90 |
| ≥ 3 | 74.13% | 96.24% | 94.39% | 0.85 | 77.92% | 96.55% | 94.80% | 0.87 | 81.20% | 96.36% | 94.71% | 0.89 | 81.58% | | 96.47% | 95.11% | 0.89 | 80.72% | | 96.29% | 94.63% | 0.89 |
| ≥ 4 | 50.14% | 99.13% | 95.02% | 0.75 | 55.11% | 99.17% | 95.02% | 0.77 | 59.94% | 99.05% | 94.79% | 0.80 | 60.41% | | 99.12% | 95.57% | 0.80 | 53.60% | | 99.18% | 94.32% | 0.76 |
| ≥ 5 | 26.84% | 99.88% | 93.76% | 0.63 | 29.19% | 99.85% | 93.21% | 0.64 | 34.69% | 99.80% | 92.71% | 0.67 | 35.89% | | 99.83% | 93.97% | 0.68 | 33.37% | | 99.89% | 92.79% | 0.67 |
| ≥ 6 | 16.47% | 99.94% | 92.95% | 0.58 | 19.82% | 99.94% | 92.41% | 0.60 | 23.54% | 99.91% | 91.59% | 0.62 | 24.00% | | 99.90% | 92.95% | 0.62 | 23.73% | | 99.94% | 91.81% | 0.62 |

| **Supplementary Table 5.** Predictive values of reduced PHQ subscales (8 and 2 items) compared to scale with 9 items, according scholarly, PNS (2013 and 2019). | | | | | | | | | | | | | | | | | |
| --- | --- | --- | --- | --- | --- | --- | --- | --- | --- | --- | --- | --- | --- | --- | --- | --- | --- |
| **Incomplete primary or equivalent** | | | | | **High school incomplete or equivalent** | | | | **Higher education incomplete or equivalent** | | | | **Higher education complete** | | | | |
| **Cutpoint** | **Sens** | **Esp** | **CC** | **AUC** | **Sens** | **Esp** | **CC** | **AUC** | **Sens** | **Esp** | **CC** | **AUC** | **Sens** | **Esp** | **CC** | **AUC** |
| **PHQ-9 scores** | |  |  |  |  |  |  |  |  |  |  |  |  |  |  |  |
| ≥ 0 | 100.0% | 0.0% | 10.9% | 0.50 | 100.0% | 0.0% | 9.8% | 0.50 | 100.0% | 0.0% | 8.8% | 0.50 | 100.0% | 0.0% | 7.8% | 0.50 |
| ≥ 1 | 100.0% | 44.5% | 50.5% | 0.72 | 100.0% | 47.9% | 53.0% | 0.74 | 100.0% | 48.1% | 52.7% | 0.74 | 100.0% | 47.2% | 51.3% | 0.74 |
| ≥ 2 | 100.0% | 57.1% | 61.7% | 0.79 | 100.0% | 60.6% | 64.4% | 0.80 | 100.0% | 60.4% | 63.9% | 0.80 | 100.0% | 60.0% | 63.1% | 0.80 |
| ≥ 3 | 100.0% | 66.4% | 70.1% | 0.83 | 100.0% | 69.7% | 72.7% | 0.85 | 100.0% | 69.6% | 72.2% | 0.85 | 100.0% | 69.4% | 71.8% | 0.85 |
| ≥ 4 | 100.0% | 75.8% | 78.4% | 0.88 | 100.0% | 78.1% | 80.3% | 0.89 | 100.0% | 78.0% | 79.9% | 0.89 | 100.0% | 77.7% | 79.4% | 0.89 |
| ≥ 5 | 100.0% | 82.2% | 84.1% | 0.91 | 100.0% | 84.1% | 85.7% | 0.92 | 100.0% | 84.0% | 85.4% | 0.92 | 100.0% | 83.7% | 85.0% | 0.92 |
| ≥ 6 | 100.0% | 87.1% | 88.5% | 0.94 | 100.0% | 88.7% | 89.8% | 0.94 | 100.0% | 88.4% | 89.4% | 0.94 | 100.0% | 88.4% | 89.3% | 0.94 |
| ≥ 7 | 100.0% | 91.8% | 92.7% | 0.96 | 100.0% | 92.8% | 93.5% | 0.96 | 100.0% | 92.6% | 93.3% | 0.96 | 100.0% | 92.7% | 93.2% | 0.96 |
| ≥ 8 | 99.7% | 95.2% | 95.7% | 0.97 | 99.8% | 95.9% | 96.3% | 0.98 | 99.8% | 95.8% | 96.1% | 0.98 | 99.9% | 95.8% | 96.1% | 0.98 |
| **≥ 9** | 99.1% | 97.8% | 98.0% | 0.98 | 99.1% | 98.2% | 98.3% | 0.99 | 99.4% | 98.2% | 98.3% | 0.99 | 99.8% | 98.3% | 98.4% | 0.99 |
| ≥ 10 | 95.8% | 100.0% | 99.5% | 0.98 | 96.5% | 100.0% | 99.7% | 0.98 | 97.2% | 100.0% | 99.8% | 0.99 | 97.6% | 100.0% | 99.8% | 0.99 |
| ≥ 11 | 79.5% | 100.0% | 97.8% | 0.90 | 79.9% | 100.0% | 98.0% | 0.90 | 78.8% | 100.0% | 98.1% | 0.89 | 80.1% | 100.0% | 98.5% | 0.90 |
| ≥ 12 | 67.4% | 100.0% | 96.5% | 0.84 | 67.1% | 100.0% | 96.8% | 0.84 | 66.2% | 100.0% | 97.0% | 0.83 | 66.7% | 100.0% | 97.4% | 0.83 |
| ≥ 13 | 55.6% | 100.0% | 95.2% | 0.78 | 54.5% | 100.0% | 95.5% | 0.77 | 53.6% | 100.0% | 95.9% | 0.77 | 53.3% | 100.0% | 96.4% | 0.77 |
| ≥ 14 | 46.5% | 100.0% | 94.2% | 0.73 | 45.8% | 100.0% | 94.7% | 0.73 | 44.9% | 100.0% | 95.2% | 0.72 | 42.9% | 100.0% | 95.6% | 0.71 |
| ≥ 15 | 38.1% | 100.0% | 93.3% | 0.69 | 37.7% | 100.0% | 93.9% | 0.69 | 36.2% | 100.0% | 94.4% | 0.68 | 34.3% | 100.0% | 94.9% | 0.67 |
| ≥ 16 | 23.5% | 100.0% | 91.7% | 0.62 | 24.6% | 100.0% | 92.6% | 0.62 | 22.4% | 100.0% | 93.2% | 0.61 | 20.5% | 100.0% | 93.8% | 0.60 |
| ≥ 17 | 19.3% | 100.0% | 91.2% | 0.60 | 20.4% | 100.0% | 92.2% | 0.60 | 18.1% | 100.0% | 92.8% | 0.59 | 16.6% | 100.0% | 93.5% | 0.58 |
| ≥ 18 | 14.8% | 100.0% | 90.8% | 0.57 | 14.8% | 100.0% | 91.6% | 0.57 | 13.5% | 100.0% | 92.4% | 0.57 | 12.1% | 100.0% | 93.2% | 0.56 |
| ≥ 19 | 11.8% | 100.0% | 90.4% | 0.56 | 11.5% | 100.0% | 91.3% | 0.56 | 10.4% | 100.0% | 92.1% | 0.55 | 9.8% | 100.0% | 93.0% | 0.55 |
| ≥ 20 | 9.3% | 100.0% | 90.2% | 0.55 | 8.8% | 100.0% | 91.1% | 0.54 | 8.0% | 100.0% | 91.9% | 0.54 | 7.3% | 100.0% | 92.8% | 0.54 |
| ≥ 21 | 3.8% | 100.0% | 89.6% | 0.52 | 3.5% | 100.0% | 90.5% | 0.52 | 3.0% | 100.0% | 91.5% | 0.52 | 2.4% | 100.0% | 92.4% | 0.51 |
| ≥ 22 | 2.9% | 100.0% | 89.5% | 0.51 | 2.5% | 100.0% | 90.4% | 0.51 | 2.1% | 100.0% | 91.4% | 0.51 | 1.7% | 100.0% | 92.4% | 0.51 |
| ≥ 23 | 0.0% | 100.0% | 89.2% | 0.50 | 0.0% | 100.0% | 90.2% | 0.50 | 0.0% | 100.0% | 91.2% | 0.50 | 0.0% | 100.0% | 92.2% | 0.50 |
| ≥ 24 | 100.0% | 0.0% | 10.9% | 0.50 | 100.0% | 0.0% | 9.8% | 0.50 | 100.0% | 0.0% | 8.8% | 0.50 | 100.0% | 0.0% | 7.8% | 0.50 |
| **PHQ-2 scores** | |  |  |  |  |  |  |  |  |  |  |  |  |  |  |  |
| ≥ 0 | 100.0% | 0.0% | 10.9% | 0.50 | 100.0% | 0.0% | 9.8% | 0.50 | 100.0% | 0.0% | 8.8% | 0.50 | 100.0% | 0.0% | 7.8% | 0.50 |
| ≥ 1 | 98.3% | 69.7% | 72.8% | 0.84 | 98.5% | 71.2% | 73.9% | 0.85 | 98.2% | 71.1% | 73.5% | 0.85 | 98.0% | 73.8% | 75.7% | 0.86 |
| ≥ 2 | 94.0% | 86.8% | 87.6% | 0.90 | 94.8% | 87.5% | 88.2% | 0.91 | 93.4% | 87.6% | 88.1% | 0.91 | 91.5% | 88.7% | 88.9% | 0.90 |
| ≥ 3 | 80.7% | 96.1% | 94.5% | 0.88 | 80.4% | 96.1% | 94.5% | 0.88 | 77.4% | 96.5% | 94.8% | 0.87 | 74.5% | 97.3% | 95.6% | 0.86 |
| ≥ 4 | 57.7% | 99.1% | 94.6% | 0.78 | 57.6% | 99.0% | 94.9% | 0.78 | 55.6% | 99.1% | 95.3% | 0.77 | 52.0% | 99.3% | 95.6% | 0.76 |
| ≥ 5 | 32.8% | 99.8% | 92.6% | 0.66 | 33.4% | 99.8% | 93.3% | 0.67 | 30.5% | 99.8% | 93.8% | 0.65 | 28.3% | 99.9% | 94.3% | 0.64 |
| ≥ 6 | 22.4% | 99.9% | 91.5% | 0.61 | 21.9% | 99.9% | 92.3% | 0.61 | 20.2% | 99.9% | 92.9% | 0.60 | 18.5% | 99.9% | 93.6% | 0.59 |

| **Supplementary Table 6.** Predictive values of reduced PHQ subscales (8 and 2 items) compared to scale with 9 items, according income, PNS (2013 and 2019). | | | | | | | | | | | | | | | | | | | | |
| --- | --- | --- | --- | --- | --- | --- | --- | --- | --- | --- | --- | --- | --- | --- | --- | --- | --- | --- | --- | --- |
| **Cutpoint** | **Sens** | **Esp** | **CC** | **AUC** | **Sens** | **Esp** | **CC** | **AUC** | **Sens** | **Esp** | **CC** | **AUC** | **Sens** | **Esp** | **CC** | **AUC** | **Sens** | **Esp** | **CC** | **AUC** |
| **Up to ½ MW** | | | | | **½ to 1 MW** | | | | **1 to 2 MW** | | | | **2 to 3 MW** | | | | **More than 3 MW** | | | |
| **PHQ-9 scores** | |  |  |  |  |  |  |  |  |  |  |  |  |  |  |  |  |  |  |  |
| ≥ 0 | 100.0% | 0.0% | 12.3% | 0.50 | 100.0% | 0.0% | 11.3% | 0.50 | 100.0% | 0.0% | 9.7% | 0.50 | 100.0% | 0.0% | 9.0% | 0.50 | 100.0% | 0.0% | 8.2% | 0.50 |
| ≥ 1 | 100.0% | 42.7% | 49.7% | 0.71 | 100.0% | 42.6% | 49.0% | 0.71 | 100.0% | 44.8% | 50.1% | 0.72 | 100.0% | 45.5% | 50.4% | 0.73 | 100.0% | 49.8% | 53.9% | 0.75 |
| ≥ 2 | 100.0% | 55.5% | 61.0% | 0.78 | 100.0% | 55.3% | 60.3% | 0.78 | 100.0% | 57.7% | 61.8% | 0.79 | 100.0% | 58.8% | 62.5% | 0.79 | 100.0% | 62.0% | 65.1% | 0.81 |
| ≥ 3 | 100.0% | 65.2% | 69.5% | 0.83 | 100.0% | 64.9% | 68.8% | 0.82 | 100.0% | 67.3% | 70.4% | 0.84 | 100.0% | 68.4% | 71.2% | 0.84 | 100.0% | 70.9% | 73.2% | 0.85 |
| ≥ 4 | 100.0% | 74.3% | 77.5% | 0.87 | 100.0% | 74.5% | 77.4% | 0.87 | 100.0% | 76.2% | 78.5% | 0.88 | 100.0% | 77.1% | 79.2% | 0.89 | 100.0% | 79.2% | 80.9% | 0.90 |
| ≥ 5 | 100.0% | 80.7% | 83.1% | 0.90 | 100.0% | 81.4% | 83.5% | 0.91 | 100.0% | 82.7% | 84.3% | 0.91 | 100.0% | 83.5% | 85.0% | 0.92 | 100.0% | 84.9% | 86.1% | 0.92 |
| ≥ 6 | 100.0% | 86.0% | 87.7% | 0.93 | 100.0% | 86.5% | 88.0% | 0.93 | 100.0% | 87.4% | 88.6% | 0.94 | 100.0% | 88.3% | 89.4% | 0.94 | 100.0% | 89.3% | 90.1% | 0.95 |
| ≥ 7 | 100.0% | 90.8% | 91.9% | 0.95 | 100.0% | 91.2% | 92.2% | 0.96 | 100.0% | 92.1% | 92.8% | 0.96 | 100.0% | 93.1% | 93.7% | 0.97 | 100.0% | 93.2% | 93.8% | 0.97 |
| ≥ 8 | 99.6% | 94.7% | 95.3% | 0.97 | 99.8% | 95.0% | 95.6% | 0.97 | 100.0% | 95.4% | 95.9% | 0.98 | 99.9% | 96.0% | 96.3% | 0.98 | 99.7% | 96.1% | 96.4% | 0.98 |
| **≥ 9** | 99.1% | 97.7% | 97.9% | 0.98 | 99.1% | 97.7% | 97.9% | 0.98 | 99.6% | 98.0% | 98.1% | 0.99 | 99.3% | 98.4% | 98.4% | 0.99 | 99.3% | 98.3% | 98.4% | 0.99 |
| ≥ 10 | 95.9% | 100.0% | 99.5% | 0.98 | 96.8% | 100.0% | 99.6% | 0.98 | 97.0% | 100.0% | 99.7% | 0.99 | 97.5% | 100.0% | 99.8% | 0.99 | 96.3% | 100.0% | 99.7% | 0.98 |
| ≥ 11 | 79.9% | 100.0% | 97.5% | 0.90 | 80.5% | 100.0% | 97.8% | 0.90 | 80.4% | 100.0% | 98.1% | 0.90 | 79.5% | 100.0% | 98.2% | 0.90 | 78.2% | 100.0% | 98.2% | 0.89 |
| ≥ 12 | 68.1% | 100.0% | 96.1% | 0.84 | 67.8% | 100.0% | 96.4% | 0.84 | 67.2% | 100.0% | 96.8% | 0.84 | 66.6% | 100.0% | 97.0% | 0.83 | 65.9% | 100.0% | 97.2% | 0.83 |
| ≥ 13 | 56.2% | 100.0% | 94.6% | 0.78 | 55.8% | 100.0% | 95.0% | 0.78 | 54.5% | 100.0% | 95.6% | 0.77 | 57.5% | 100.0% | 96.2% | 0.79 | 52.8% | 100.0% | 96.2% | 0.76 |
| ≥ 14 | 47.8% | 100.0% | 93.6% | 0.74 | 46.5% | 100.0% | 94.0% | 0.73 | 45.4% | 100.0% | 94.7% | 0.73 | 48.0% | 100.0% | 95.3% | 0.74 | 43.6% | 100.0% | 95.4% | 0.72 |
| ≥ 15 | 39.9% | 100.0% | 92.6% | 0.70 | 38.7% | 100.0% | 93.1% | 0.69 | 35.5% | 100.0% | 93.8% | 0.68 | 39.1% | 100.0% | 94.6% | 0.70 | 35.1% | 100.0% | 94.7% | 0.68 |
| ≥ 16 | 26.1% | 100.0% | 90.9% | 0.63 | 24.2% | 100.0% | 91.5% | 0.62 | 22.5% | 100.0% | 92.5% | 0.61 | 22.9% | 100.0% | 93.1% | 0.61 | 21.1% | 100.0% | 93.6% | 0.61 |
| ≥ 17 | 21.4% | 100.0% | 90.3% | 0.61 | 19.6% | 100.0% | 91.0% | 0.60 | 17.9% | 100.0% | 92.1% | 0.59 | 18.6% | 100.0% | 92.7% | 0.59 | 17.4% | 100.0% | 93.3% | 0.59 |
| ≥ 18 | 16.1% | 100.0% | 89.7% | 0.58 | 14.9% | 100.0% | 90.4% | 0.57 | 13.8% | 100.0% | 91.7% | 0.57 | 13.4% | 100.0% | 92.3% | 0.57 | 12.9% | 100.0% | 92.9% | 0.56 |
| ≥ 19 | 12.9% | 100.0% | 89.3% | 0.56 | 12.3% | 100.0% | 90.1% | 0.56 | 10.8% | 100.0% | 91.4% | 0.55 | 10.1% | 100.0% | 92.0% | 0.55 | 9.8% | 100.0% | 92.6% | 0.55 |
| ≥ 20 | 9.9% | 100.0% | 88.9% | 0.55 | 9.6% | 100.0% | 89.8% | 0.55 | 8.3% | 100.0% | 91.2% | 0.54 | 8.0% | 100.0% | 91.8% | 0.54 | 7.7% | 100.0% | 92.5% | 0.54 |
| ≥ 21 | 3.6% | 100.0% | 88.1% | 0.52 | 4.3% | 100.0% | 89.2% | 0.52 | 2.6% | 100.0% | 90.6% | 0.51 | 3.1% | 100.0% | 91.3% | 0.52 | 3.1% | 100.0% | 92.1% | 0.52 |
| ≥ 22 | 2.5% | 100.0% | 88.0% | 0.51 | 3.4% | 100.0% | 89.1% | 0.52 | 1.8% | 100.0% | 90.5% | 0.51 | 2.1% | 100.0% | 91.2% | 0.51 | 2.3% | 100.0% | 92.0% | 0.51 |
| ≥ 23 | 0.0% | 100.0% | 87.7% | 0.50 | 0.0% | 100.0% | 88.8% | 0.50 | 0.0% | 100.0% | 90.4% | 0.50 | 0.0% | 100.0% | 91.1% | 0.50 | 0.0% | 100.0% | 91.8% | 0.50 |
| ≥ 24 | 100.0% | 0.0% | 12.3% | 0.50 | 100.0% | 0.0% | 11.3% | 0.50 | 100.0% | 0.0% | 9.7% | 0.50 | 100.0% | 0.0% | 9.0% | 0.50 | 100.0% | 0.0% | 8.2% | 0.50 |
| **PHQ-2 scores** | |  |  |  |  |  |  |  |  |  |  |  |  |  |  |  |  |  |  |  |
| ≥ 0 | 100.0% | 0.0% | 12.3% | 0.50 | 100.0% | 0.0% | 11.3% | 0.50 | 100.0% | 0.0% | 9.7% | 0.50 | 100.0% | 0.0% | 9.0% | 0.50 | 100.0% | 0.0% | 8.2% | 0.50 |
| ≥ 1 | 98.5% | 65.7% | 69.7% | 0.82 | 98.5% | 67.9% | 71.3% | 0.83 | 98.3% | 70.8% | 73.4% | 0.85 | 99.0% | 72.3% | 74.7% | 0.86 | 98.0% | 73.7% | 75.7% | 0.86 |
| ≥ 2 | 94.9% | 84.6% | 85.9% | 0.90 | 94.4% | 86.0% | 87.0% | 0.90 | 93.6% | 87.3% | 87.9% | 0.90 | 93.2% | 88.4% | 88.8% | 0.91 | 92.7% | 88.7% | 89.1% | 0.91 |
| ≥ 3 | 81.1% | 95.7% | 93.9% | 0.88 | 79.6% | 95.9% | 94.1% | 0.88 | 78.3% | 96.6% | 94.9% | 0.87 | 77.1% | 96.9% | 95.1% | 0.87 | 78.1% | 96.7% | 95.2% | 0.87 |
| ≥ 4 | 58.7% | 99.0% | 94.0% | 0.79 | 57.1% | 99.0% | 94.3% | 0.78 | 55.4% | 99.2% | 95.0% | 0.77 | 58.4% | 99.1% | 95.5% | 0.79 | 55.0% | 99.2% | 95.6% | 0.77 |
| ≥ 5 | 32.8% | 99.8% | 91.6% | 0.66 | 32.5% | 99.8% | 92.2% | 0.66 | 30.3% | 99.9% | 93.2% | 0.65 | 33.3% | 99.9% | 93.9% | 0.67 | 31.2% | 99.8% | 94.2% | 0.66 |
| ≥ 6 | 22.1% | 99.9% | 90.3% | 0.61 | 21.5% | 99.9% | 91.1% | 0.61 | 20.7% | 100.0% | 92.3% | 0.60 | 22.3% | 100.0% | 93.0% | 0.61 | 20.8% | 99.9% | 93.5% | 0.60 |

| **Supplementary Table 7.** Predictive values of reduced PHQ subscales (8 and 2 items) compared to scale with 9 items, according diagnoses of depression, PNS (2013 and 2019). | | | | | | | | | | | |
| --- | --- | --- | --- | --- | --- | --- | --- | --- | --- | --- | --- |
| **Without depression** | | | | | | **With depression** | | | | | |
| **Cutpoint** | **Sens** | **Esp** | **CC** | **AUC** | **Youden index** | **Sens** | **Esp** | **CC** | **AUC** | **Youden index** |
| **PHQ-9 scores** | |  |  |  |  |  |  |  |  |  |
| ≥ 0 | 100.0% | 0.0% | 7.1% | 0.50 | 0.000 | 100.0% | 0.0% | 37.2% | 0.50 | 0.000 |
| ≥ 1 | 100.0% | 48.3% | 52.0% | 0.74 | 0.483 | 100.0% | 17.4% | 48.1% | 0.59 | 0.174 |
| ≥ 2 | 100.0% | 61.1% | 63.9% | 0.81 | 0.611 | 100.0% | 26.3% | 53.7% | 0.63 | 0.263 |
| ≥ 3 | 100.0% | 70.3% | 72.4% | 0.85 | 0.703 | 100.0% | 35.9% | 59.7% | 0.68 | 0.359 |
| ≥ 4 | 100.0% | 78.9% | 80.4% | 0.89 | 0.789 | 100.0% | 47.5% | 67.0% | 0.74 | 0.475 |
| ≥ 5 | 100.0% | 84.8% | 85.9% | 0.92 | 0.848 | 100.0% | 58.0% | 73.6% | 0.79 | 0.580 |
| ≥ 6 | 100.0% | 89.2% | 90.0% | 0.95 | 0.892 | 100.0% | 67.5% | 79.6% | 0.84 | 0.675 |
| ≥ 7 | 100.0% | 93.3% | 93.7% | 0.97 | 0.933 | 100.0% | 77.0% | 85.6% | 0.89 | 0.770 |
| ≥ 8 | 99.7% | 96.1% | 96.4% | 0.98 | 0.958 | 99.9% | 86.5% | 91.5% | 0.93 | 0.864 |
| **≥ 9** | 99.1% | 98.3% | 98.4% | 0.99 | 0.974 | 99.6% | 94.1% | 96.2% | 0.97 | 0.937 |
| ≥ 10 | 96.3% | 100.0% | 99.7% | 0.98 | 0.963 | 96.9% | 100.0% | 98.9% | 0.98 | 0.969 |
| ≥ 11 | 76.7% | 100.0% | 98.4% | 0.88 | 0.767 | 85.0% | 100.0% | 94.4% | 0.93 | 0.850 |
| ≥ 12 | 63.0% | 100.0% | 97.4% | 0.82 | 0.630 | 75.2% | 100.0% | 90.8% | 0.88 | 0.752 |
| ≥ 13 | 49.6% | 100.0% | 96.4% | 0.75 | 0.496 | 64.9% | 100.0% | 87.0% | 0.82 | 0.649 |
| ≥ 14 | 39.9% | 100.0% | 95.7% | 0.70 | 0.399 | 57.1% | 100.0% | 84.0% | 0.79 | 0.571 |
| ≥ 15 | 31.5% | 100.0% | 95.1% | 0.66 | 0.315 | 48.6% | 100.0% | 80.9% | 0.74 | 0.486 |
| ≥ 16 | 18.2% | 100.0% | 94.2% | 0.59 | 0.182 | 33.0% | 100.0% | 75.1% | 0.66 | 0.330 |
| ≥ 17 | 14.4% | 100.0% | 93.9% | 0.57 | 0.144 | 27.9% | 100.0% | 73.2% | 0.64 | 0.279 |
| ≥ 18 | 10.5% | 100.0% | 93.7% | 0.55 | 0.105 | 21.6% | 100.0% | 70.8% | 0.61 | 0.216 |
| ≥ 19 | 8.2% | 100.0% | 93.5% | 0.54 | 0.082 | 17.3% | 100.0% | 69.2% | 0.59 | 0.173 |
| ≥ 20 | 6.2% | 100.0% | 93.4% | 0.53 | 0.062 | 13.8% | 100.0% | 67.9% | 0.57 | 0.138 |
| ≥ 21 | 2.1% | 100.0% | 93.1% | 0.51 | 0.021 | 6.0% | 100.0% | 65.0% | 0.53 | 0.060 |
| ≥ 22 | 1.6% | 100.0% | 93.0% | 0.51 | 0.016 | 4.4% | 100.0% | 64.4% | 0.52 | 0.044 |
| ≥ 23 | 0.0% | 100.0% | 92.9% | 0.50 | 0.000 | 0.0% | 100.0% | 62.8% | 0.50 | 0.000 |
| ≥ 24 | 100.0% | 0.0% | 7.1% | 0.50 | 0.000 | 100.0% | 0.0% | 37.2% | 0.50 | 0.000 |
| **PHQ-2 scores** | |  |  |  |  |  |  |  |  |  |
| ≥ 0 | 100.0% | 0.0% | 7.1% | 0.50 | 0.000 | 100.0% | 0.0% | 37.2% | 0.50 | 0.000 |
| ≥ 1 | 97.8% | 72.7% | 74.5% | 0.85 | 0.706 | 99.2% | 42.8% | 63.8% | 0.71 | 0.420 |
| ≥ 2 | 92.4% | 88.7% | 88.9% | 0.91 | 0.810 | 96.4% | 67.4% | 78.2% | 0.82 | 0.637 |
| ≥ 3 | 76.1% | 96.8% | 95.4% | 0.86 | 0.729 | 85.0% | 89.9% | 88.1% | 0.87 | 0.749 |
| ≥ 4 | 51.6% | 99.3% | 95.9% | 0.75 | 0.508 | 66.5% | 97.1% | 85.7% | 0.82 | 0.635 |
| ≥ 5 | 27.0% | 99.9% | 94.7% | 0.63 | 0.268 | 41.6% | 99.4% | 77.9% | 0.71 | 0.411 |
| ≥ 6 | 17.2% | 99.9% | 94.1% | 0.59 | 0.171 | 29.8% | 99.8% | 73.7% | 0.65 | 0.295 |
